# Supplementary material for: Miramides A–D: Identification of Detoxin-like Depsipeptides after Heterologous Expression of a Hybrid NRPS-PKS Gene Cluster from Streptomyces mirabilis Lu17588
Source: MDPI journal article supplement (doi:10.3390/microorganisms10091752), 2022-08-30
Supplement: s1 [file s1]

## Miramides A-D, detoxin-like depsipeptides identified after heterologous Expression of a hybrid NRPS-PKS gene cluster from *Streptomyces mirabilis* Lu17588

**Table S1.** Bacterial strains, cosmids and BACs used in this study.

| Bacterial strain                      | Function                                                          | Reference     |
|---------------------------------------|-------------------------------------------------------------------|---------------|
| <i>Streptomyces mirabilis</i> Lu17588 | Strain harboring miramide gene cluster                            | This work.    |
| <i>Streptomyces albus</i> pSMART_cl1  | <i>S. albus</i> Del14 strain harboring BAC pSMART_cl1             | This work.    |
| <i>Streptomyces albus</i> Del14       | Heterologous expression host                                      | [1]           |
| <i>E. coli</i> GB05 redCC             | Strain for cosmid assembly and cloning                            |               |
| <i>E. coli</i> ET12567 pUB 307        | Strain for cosmid assembly and cloning                            | [2]           |
| <b>BACs</b>                           |                                                                   |               |
| pSMART_assembl                        | AmR; BAC vector                                                   | Lucigen (USA) |
| pSMART_cl1                            | BAC vector containing chromosomal fragment of <i>S. mirabilis</i> | This work.    |
| <b>Cosmid</b>                         |                                                                   |               |
| Cos15A_gus                            | Cloning vector                                                    | This work.    |

**Table S2.** NMR spectroscopic data of miramide A (**1**) in D<sub>2</sub>O (500 MHz).

| position | $\delta_c^a$          | $\delta_H^b$              | $^1H, ^1H$ -COSY | HMBC       | 1D select. TOCSY |
|----------|-----------------------|---------------------------|------------------|------------|------------------|
| 1        | 56.1, CH              | 4.20 (d, 4.6)             | 2                | 2, 3, 4, 6 |                  |
| 2        | 35.8, CH              | 1.97 (m)                  | 1, 3             | -          |                  |
| 3        | 14.5, CH <sub>3</sub> | 1.06 (3H.d, 7.0)          | 2                | 1, 2, 4    | 1, 2, 4, 5       |
| 4        | 23.2, CH <sub>2</sub> | 1.47 (m)<br>1.16 (m)      | 2, 5             | -          |                  |
| 5        | 10.6, CH <sub>3</sub> | 0.90 (t, 7.3)             | 4                | 2, 4       |                  |
| 6        | 169.7, C              | -                         | -                | -          |                  |
| 7        | 58.6, CH              | 4.71 (m)**                | -                | -          |                  |
| 8        | 71.4, CH              | 5.16 (q, 7.3)             | 7, 9             | 10, 11, 13 |                  |
| 9        | 29.5, CH <sub>2</sub> | 2.21*<br>1.80 (q, 2x 6.5) | 10               | 8          |                  |
| 10       | 45.7, CH <sub>2</sub> | 3.70 (m)                  | 9                | 8          |                  |

|       |                       |                                              |        |                    |
|-------|-----------------------|----------------------------------------------|--------|--------------------|
|       |                       | 3.56 (m)                                     |        |                    |
| 11    | 173.1, C              | -                                            | -      | -                  |
| 12    | 20.2, CH <sub>3</sub> | 2.05 (3H, s)                                 | -      | 11                 |
| 13    | 71.8, CH              | 5.59 (td, 7.0, 3.0)                          | 7, 14  | 8, 15, 16          |
| 14    | 38.9, CH <sub>2</sub> | 2.43 (m)                                     | 13     | 7, 13, 15          |
|       |                       | 2.38 (m)                                     | 13     | 7, 13, 15          |
| 15    | 177.2, C              | -                                            | -      | -                  |
| 16    | 171.3, C              | -                                            | -      | -                  |
| 17    | 54.1, CH              | 4.64 (m)**                                   | -      | -                  |
| 18    | 36.1, CH <sub>2</sub> | 3.15 (dd, 14.0, 6.4)<br>2.92 (dd, 14.0, 9.0) | 17     | 16, 17, 19, 20, 24 |
| 19    | 136.3, C              | -                                            | -      | -                  |
| 20,24 | 128.9, CH             | 7.22 (m)                                     | 21, 23 | 18, 22             |
| 21,23 | 128.6, CH             | 7.30 (m)                                     | 20, 24 | 19, 20, 24         |
| 22    | 126.9, CH             | 7.23 (m)                                     | 21, 23 | 20, 24             |
| 25    | 174.0, C              | -                                            | -      | -                  |
| 26    | 40.0, CH <sub>2</sub> | 2.29 (dd, 14.4, 4.2)<br>2.20 (dd, 14.4, 9.0) | 27     | 25, 27, 28         |
| 27    | 73.1, CH              | 3.56 (m)*                                    | 26     | 25, 28, 29, 30     |
| 28    | 32.6, CH              | 1.47 (m)*                                    | 29, 30 | 27, 29, 30         |
| 29    | 17.7, CH <sub>3</sub> | 0.76 (3H, d, 7.0)                            | 28     | 27, 28, 30         |
| 30    | 16.3, CH <sub>3</sub> | 0.76 (3H, d, 7.0)                            | 28     | 27, 28, 29         |

\*overlap

\*\* under water signal

<sup>a</sup>followed by multiplicity, <sup>13</sup>C chemical shifts were all taken from HSQC and HMBC spectra

<sup>b</sup>followed by multiplicity and coupling constants *J* in Hz

**Table S3.** NMR spectroscopic data of miramide B (2) and C (3) in D<sub>2</sub>O (500 MHz).

|          | Miramide B                     | Miramide C                     |                  |
|----------|--------------------------------|--------------------------------|------------------|
| position | δ <sub>H</sub> <sup>a</sup>    | δ <sub>H</sub> <sup>a</sup>    | 1D select. TOCSY |
| 1        | 4.18 <sup>b</sup> (d, 4.5)     | 4.16 <sup>b</sup> (d, 4.5)     |                  |
| 2        | 2.01 (m)                       | 2.02 (m)                       |                  |
| 3        | 1.04 <sup>b</sup> (3H, d, 7.0) | 1.03 <sup>b</sup> (3H, d, 7.0) |                  |
| 4        | 1.47 (m)                       | 1.47 (m)                       |                  |
|          | 1.14 (m)                       | 1.14 (m)                       |                  |
| 5        | 0.88 (m)                       | 0.88 (m)                       | 1, 2, 3, 4       |
| 6        | -                              | -                              |                  |
| 7        | n.d. **                        | n.d. **                        |                  |
| 8        | 5.21 (q, 7.7)                  | 5.21 (q, 7.7)                  |                  |
| 9        | n.d.*                          | n.d.*                          |                  |
| 10       | 3.68 (m)                       | 3.68 (m)                       |                  |
|          | 3.64 (m)                       | 3.64 (m)                       |                  |
| 11       | -                              | -                              |                  |
| 12       | 2.09 (s)                       | 2.09 (s)                       |                  |
| 13       | 5.51 (m)                       | 5.51 (m)                       |                  |
| 14       | n.d.*                          | n.d.*                          |                  |

|        |                                              |                                              |                    |
|--------|----------------------------------------------|----------------------------------------------|--------------------|
| 15     | -                                            | -                                            |                    |
| 16     | -                                            | -                                            |                    |
| 17     | n.d. **                                      | n.d. **                                      |                    |
| 18     | 3.14 (dd, 5.7, 14.0)<br>2.98 (dd, 8.5, 14.0) | 3.14 (dd, 5.7, 14.0)<br>2.98 (dd, 8.5, 14.0) |                    |
| 19     | -                                            | -                                            |                    |
| 20, 24 | 7.20 (m)                                     | 7.20 (m)                                     |                    |
| 21, 23 | 7.30 (m)                                     | 7.30 (m)                                     |                    |
| 22     | 7.25 (m)                                     | 7.25 (m)                                     |                    |
| 25     | -                                            | -                                            |                    |
| 26     | 2.30 (dd, 14.5, 5.0)<br>2.34 (dd, 14.5, 5.0) | 2.29 (2H, d, 6.8)                            |                    |
| 27     | 3.79 (m)                                     | 3.91 (m)                                     | 26, 28, 29, 30, 31 |
| 28     | 1.27 (m)                                     | 1.30 (m)<br>1.12 (m)                         |                    |
| 29     | 1.30 (m)<br>1.06 (m)                         | 1.58 (1H, m)                                 |                    |
| 30     | 0.78 (3H, t, 7.0)                            | 0.80 (3H, d, 7.0)                            |                    |
| 31     | 0.76 (3H, d, 7.0)                            | 0.77 (3H, d, 7.0)                            |                    |

\*overlap

\*\* under water signal

<sup>a</sup>followed by multiplicity and coupling constant *J* in Hz

<sup>b</sup>can be changed within a line

**Table S4.** NMR spectroscopic data of miramide D (**4**) in D<sub>2</sub>O (500 MHz).

| position | $\delta_{\text{H}}^{\text{a}}$               | 1D select. TOCSY |
|----------|----------------------------------------------|------------------|
| 1        | 4.08 (m)                                     |                  |
| 2        | 2.21 (m)                                     |                  |
| 3        | 1.03 (d, 6.9)                                | 1, 2, 4          |
| 4        | 0.94 (d, 6.9)                                |                  |
| 5        |                                              |                  |
| 6        | -                                            |                  |
| 7        | n.d. **                                      |                  |
| 8        | 5.19 (q, 7.7)                                |                  |
| 9        | n.d. *                                       |                  |
| 10       | 3.67 (m)<br>3.62 (m)                         |                  |
| 11       | -                                            |                  |
| 12       | 2.09 (s)                                     |                  |
| 13       | 5.50 (m)                                     |                  |
| 14       | n.d. *                                       |                  |
| 15       | -                                            |                  |
| 16       | -                                            |                  |
| 17       | n.d. **                                      |                  |
| 18       | 3.14 (dd, 5.7, 14.1)<br>2.98 (dd, 8.5, 14.1) |                  |

|        |                                              |                |
|--------|----------------------------------------------|----------------|
| 19     | -                                            |                |
| 20, 24 | 7.20 (m)                                     |                |
| 21, 23 | 7.30 (m)                                     |                |
| 22     | 7.25 (m)                                     |                |
| 25     | -                                            |                |
| 26     | 2.37 (dd, 14.5, 4.0)<br>2.23 (dd, 14.5, 9.0) |                |
| 27     | 3.61 (m)                                     | 26, 28, 29, 30 |
| 28     | 1.51 (m)                                     |                |
| 29     | 0.77 (d, 6.9)                                |                |
| 30     | 0.78 (d, 6.9)                                |                |

\*overlap

\*\* under water signal

<sup>a</sup>followed by multiplicity and coupling constant *J* in Hz

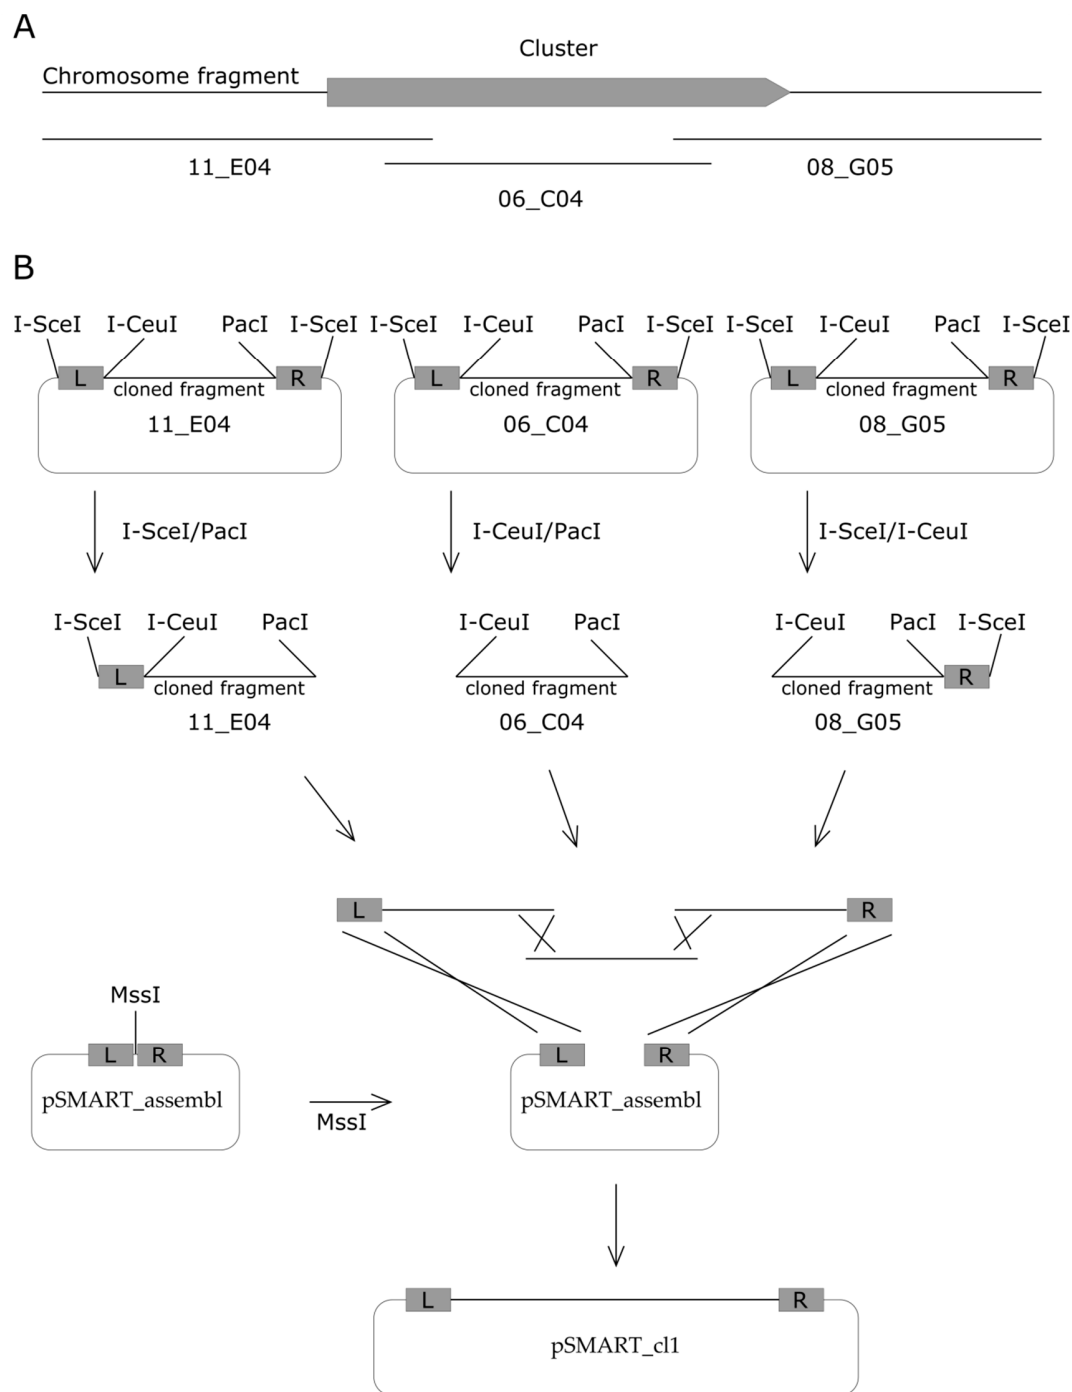

**Figure S1.** Assembly of the *S. mirabilis* chromosomal fragment containing the miramide biosynthetic gene cluster. A – Schematic representation of the chromosomal fragment with the miramide gene cluster and of the cosmids that cover the fragment. B – TAR assembly of the miramide biosynthetic gene cluster on the pSMART\_assembl backbone. The homology arms used for assembly are shown as rectangles with the letters L and R.

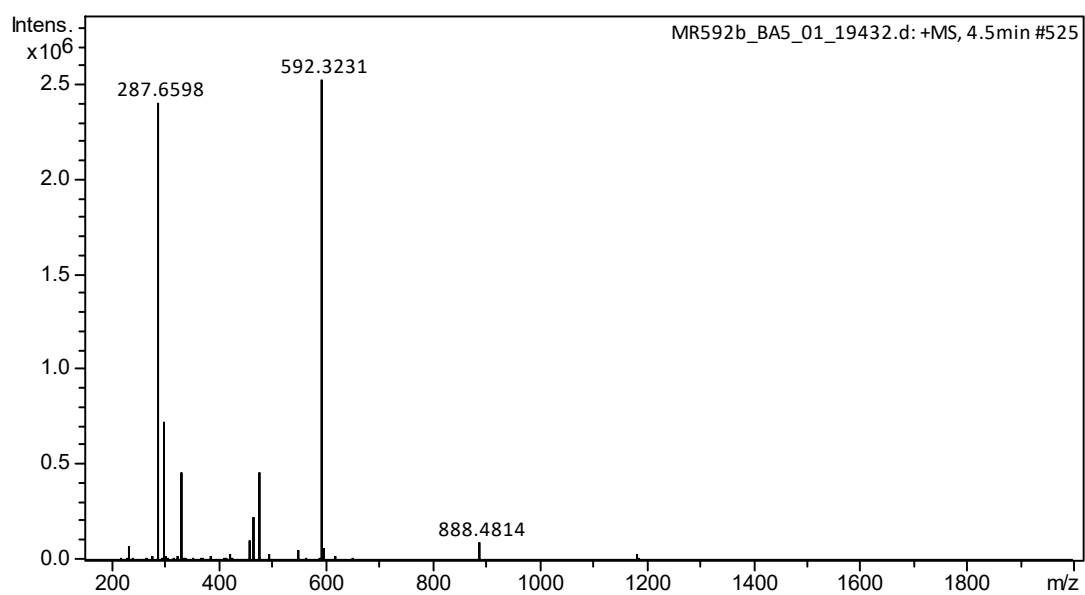

**Figure S2.** HRMS spectra of miramide A (1).

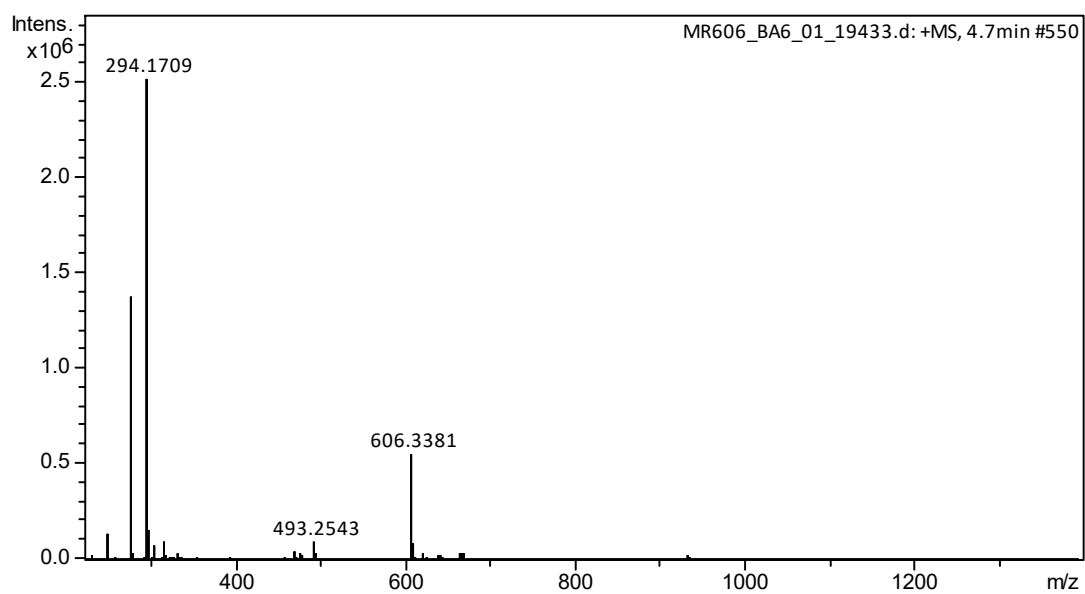

**Figure S3.** HRMS spectra of miramide B (2) and C (3).

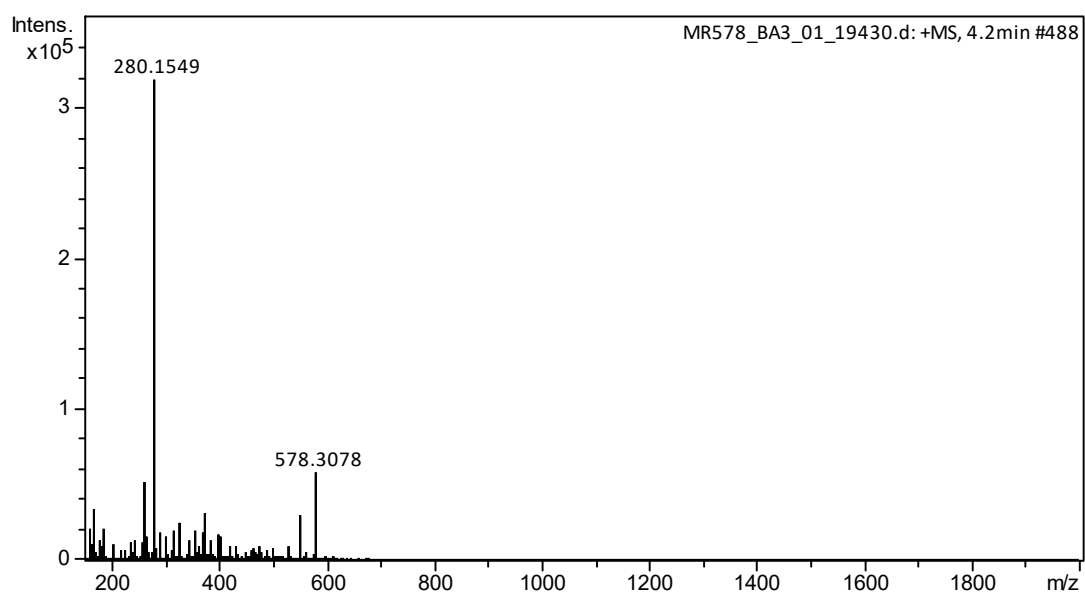

**Figure S4.** HRMS spectra of miramide D (4).

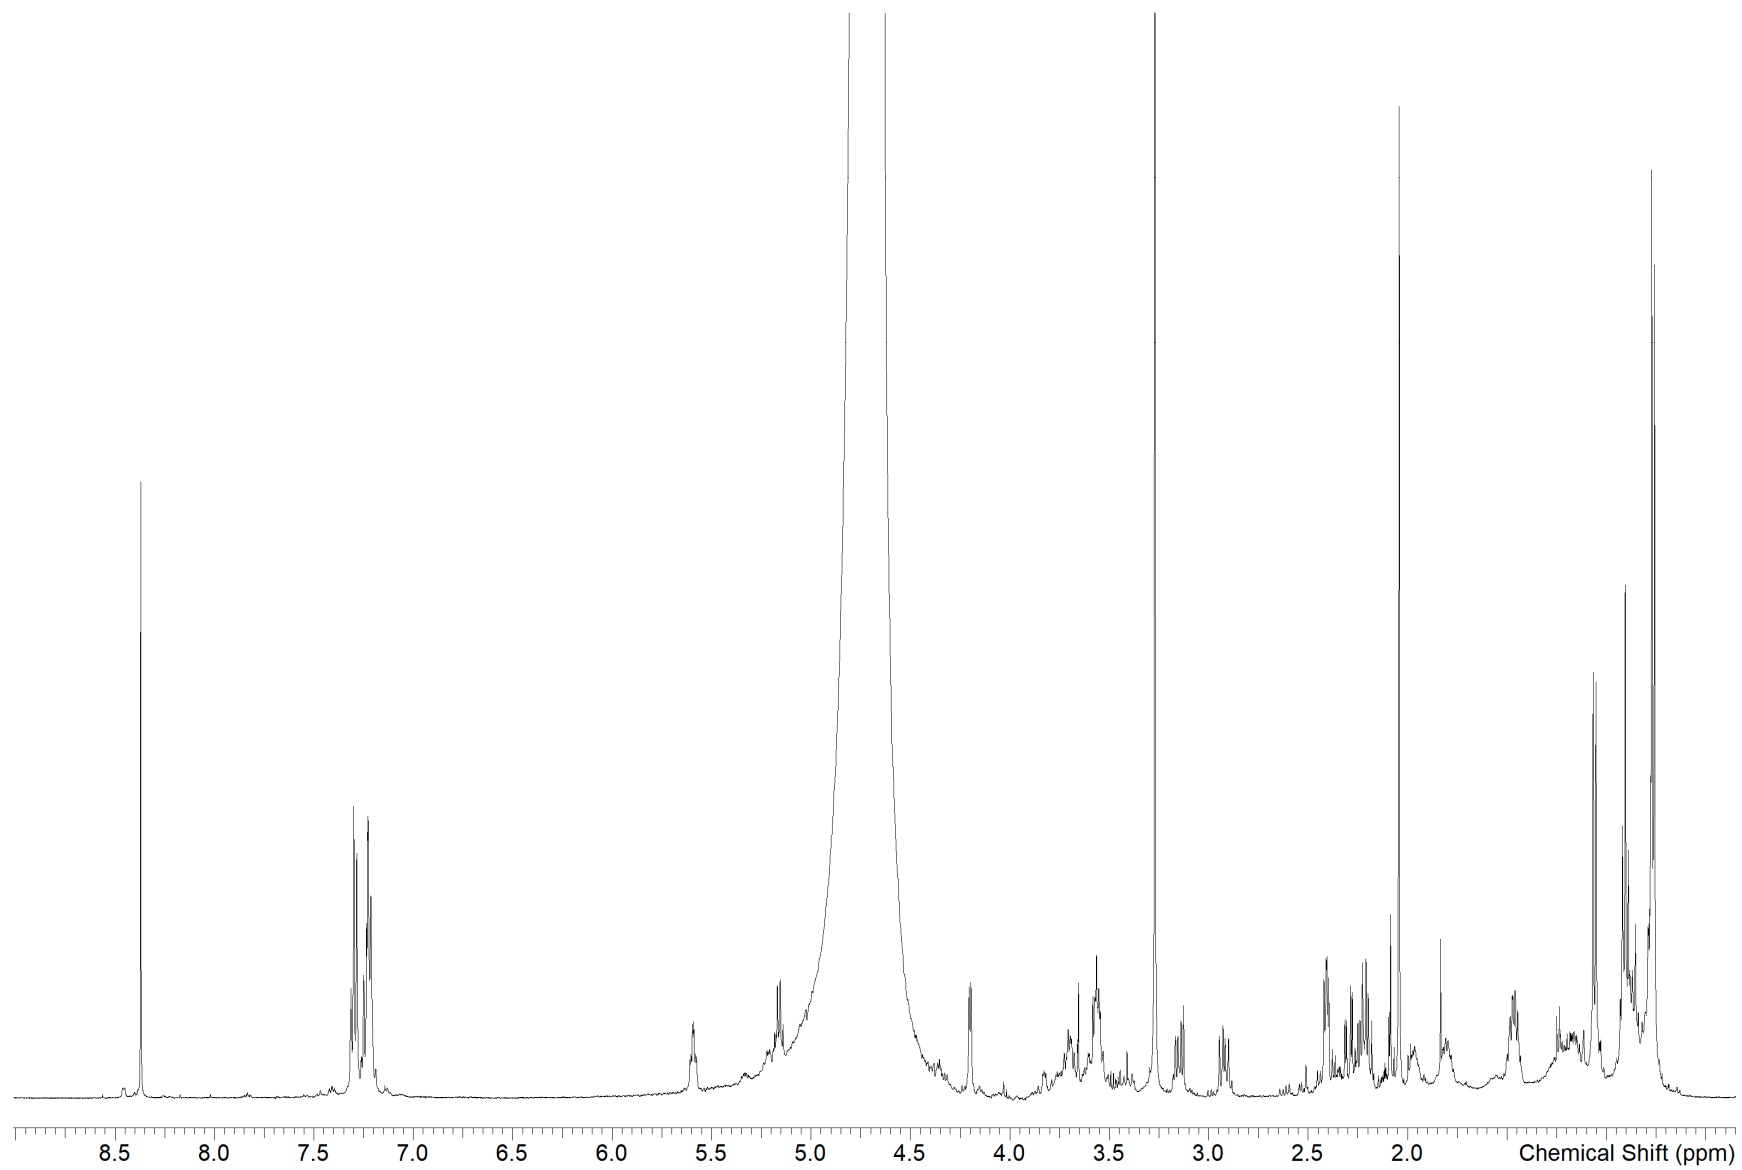

**Figure S5.**  $^1\text{H}$  NMR spectrum of miramide A (**1**) measured in  $\text{D}_2\text{O}$  (500 MHz).



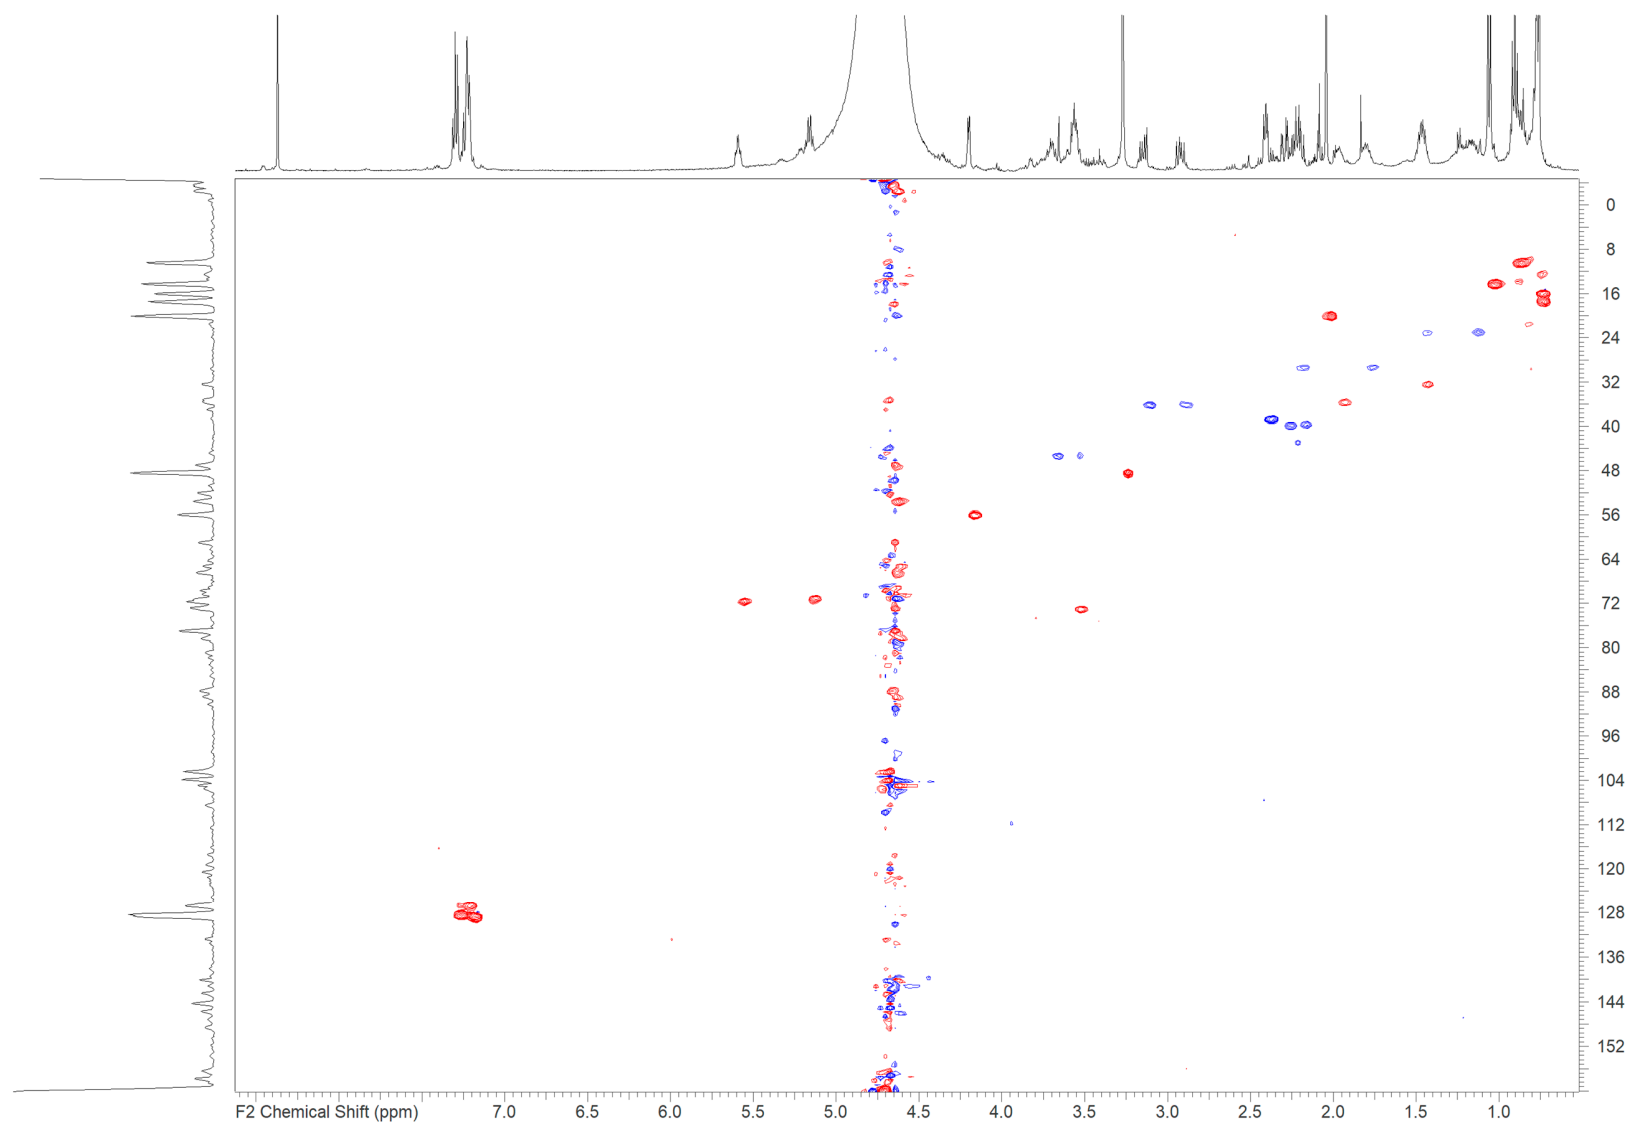

**Figure S6.** HSQC spectrum of miramide A (1) measured in D<sub>2</sub>O (500 MHz).

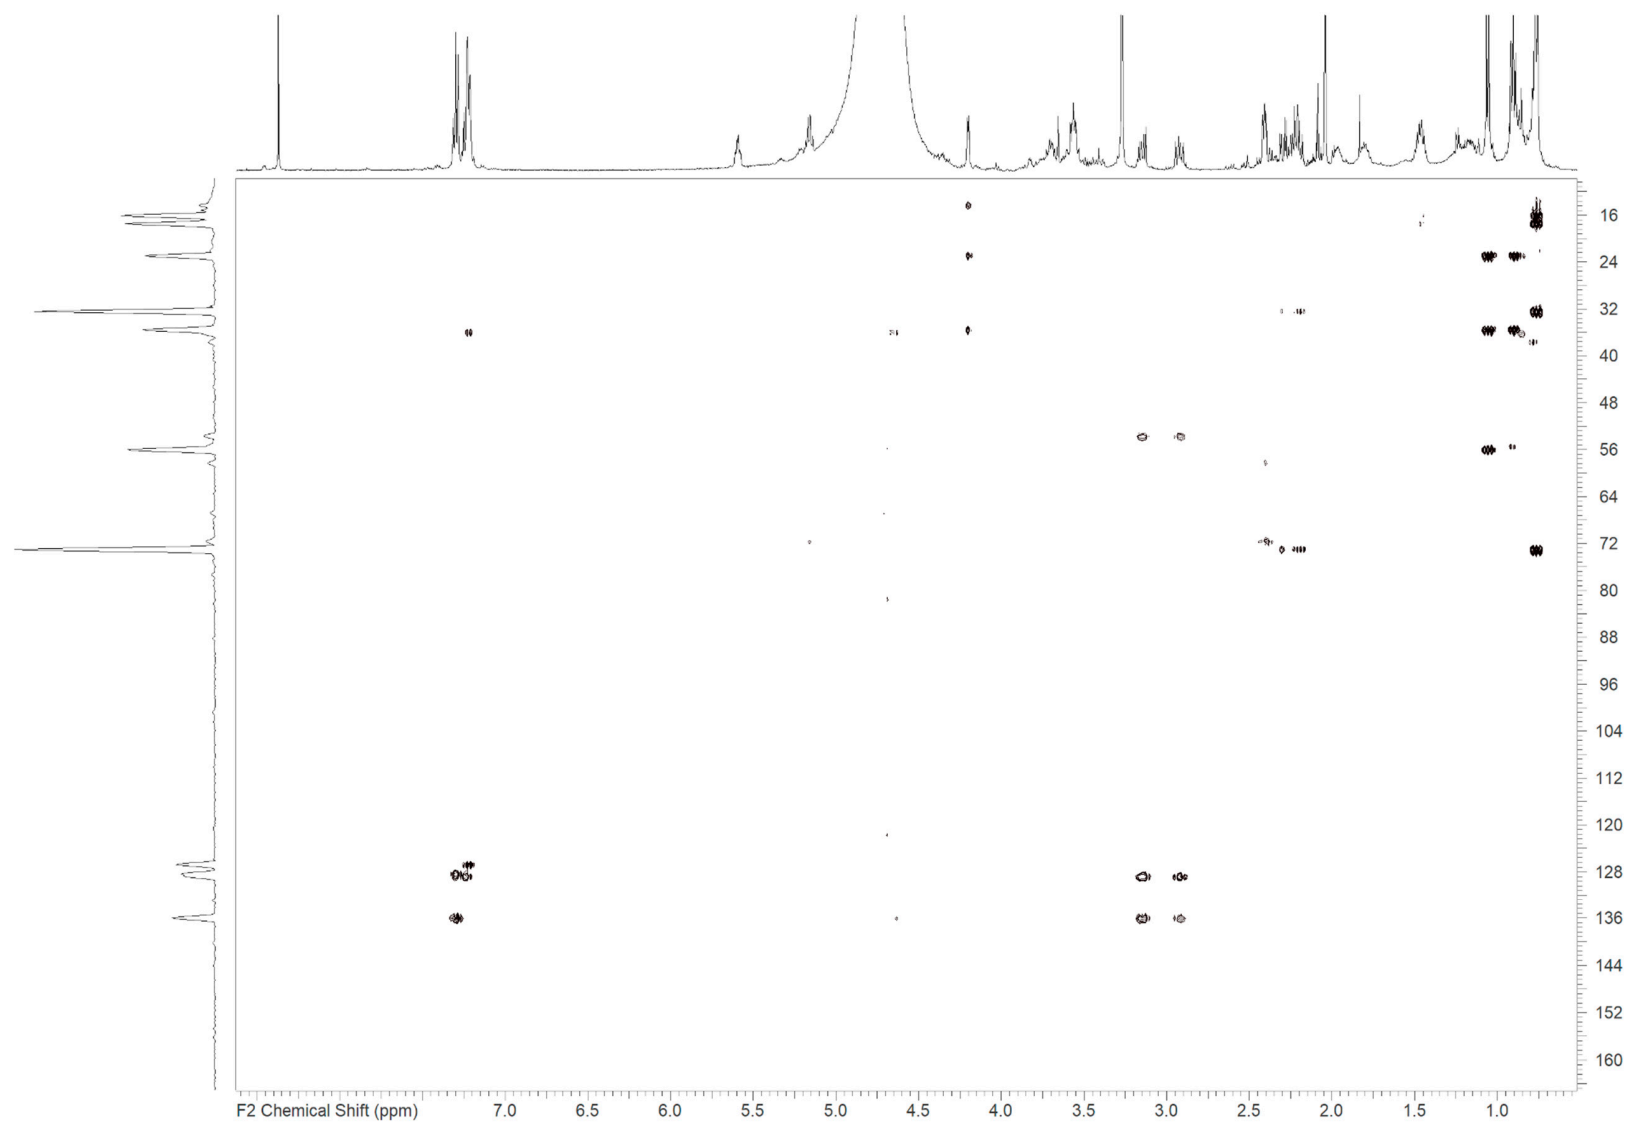

**Figure S7.** HMBC spectrum of miramide A (**1**) measured in D<sub>2</sub>O (500 MHz).

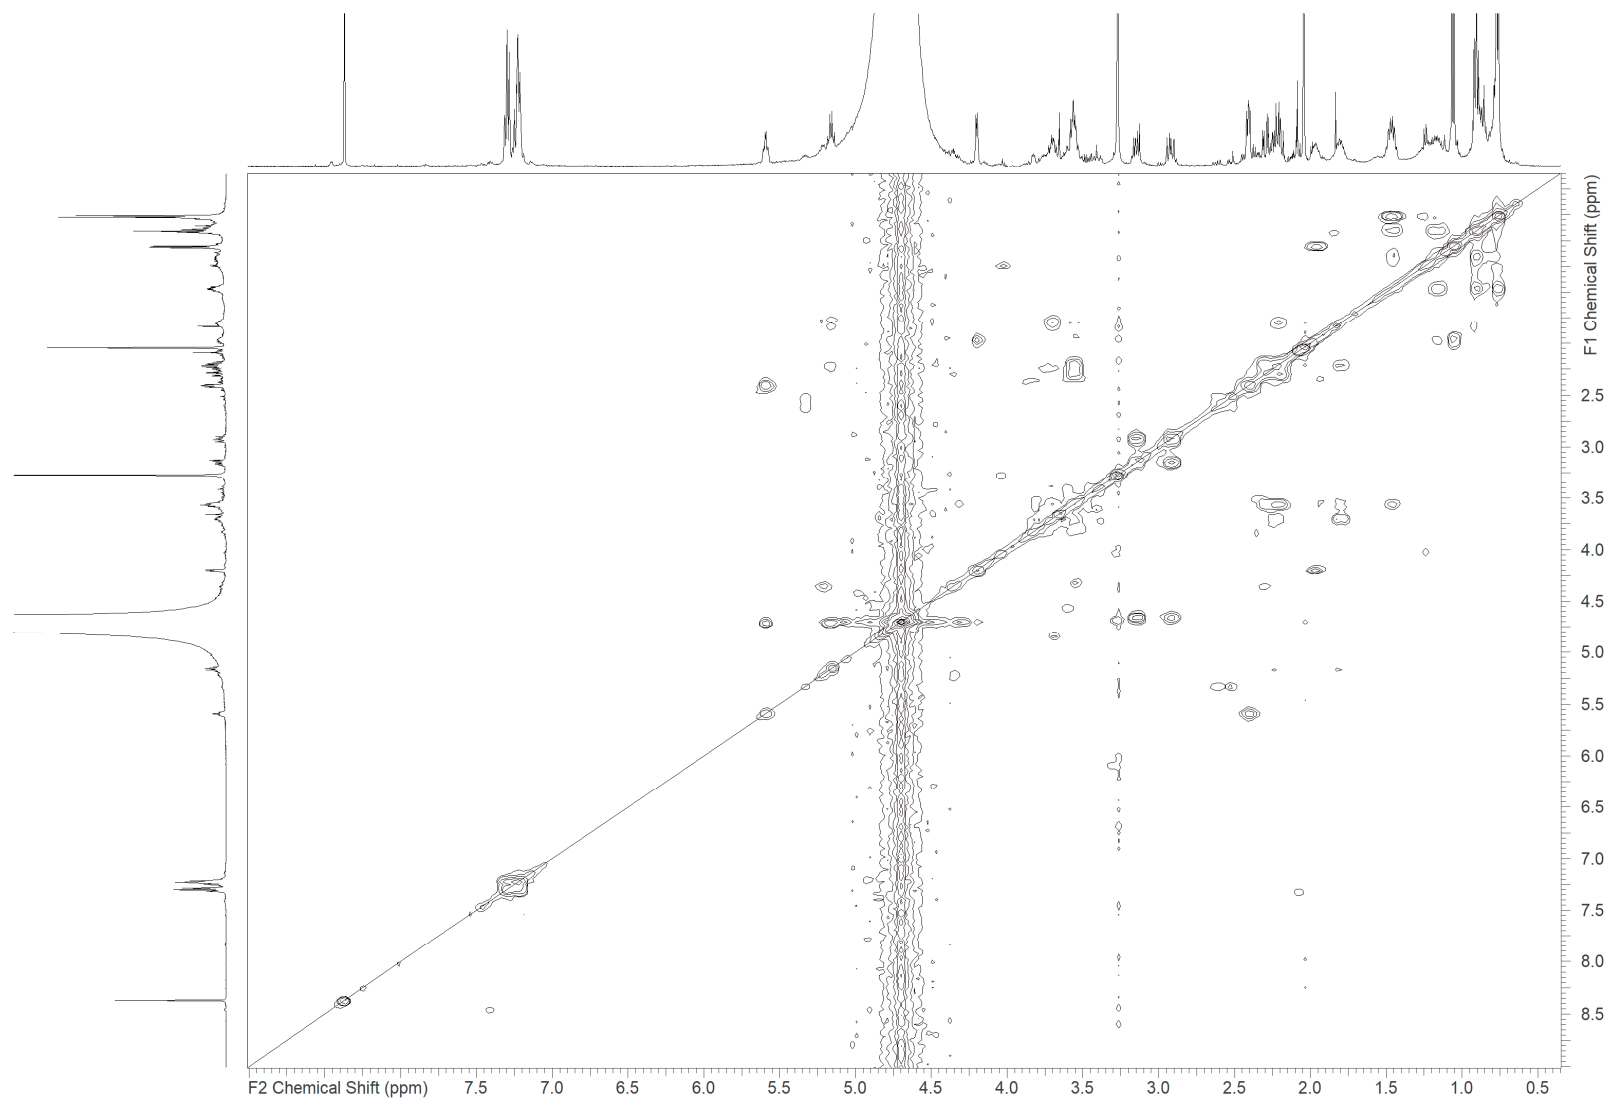

**Figure S8.**  $^1\text{H},^1\text{H}$ -COSY spectrum of miramide A (**1**) measured in  $\text{D}_2\text{O}$  (500 MHz).

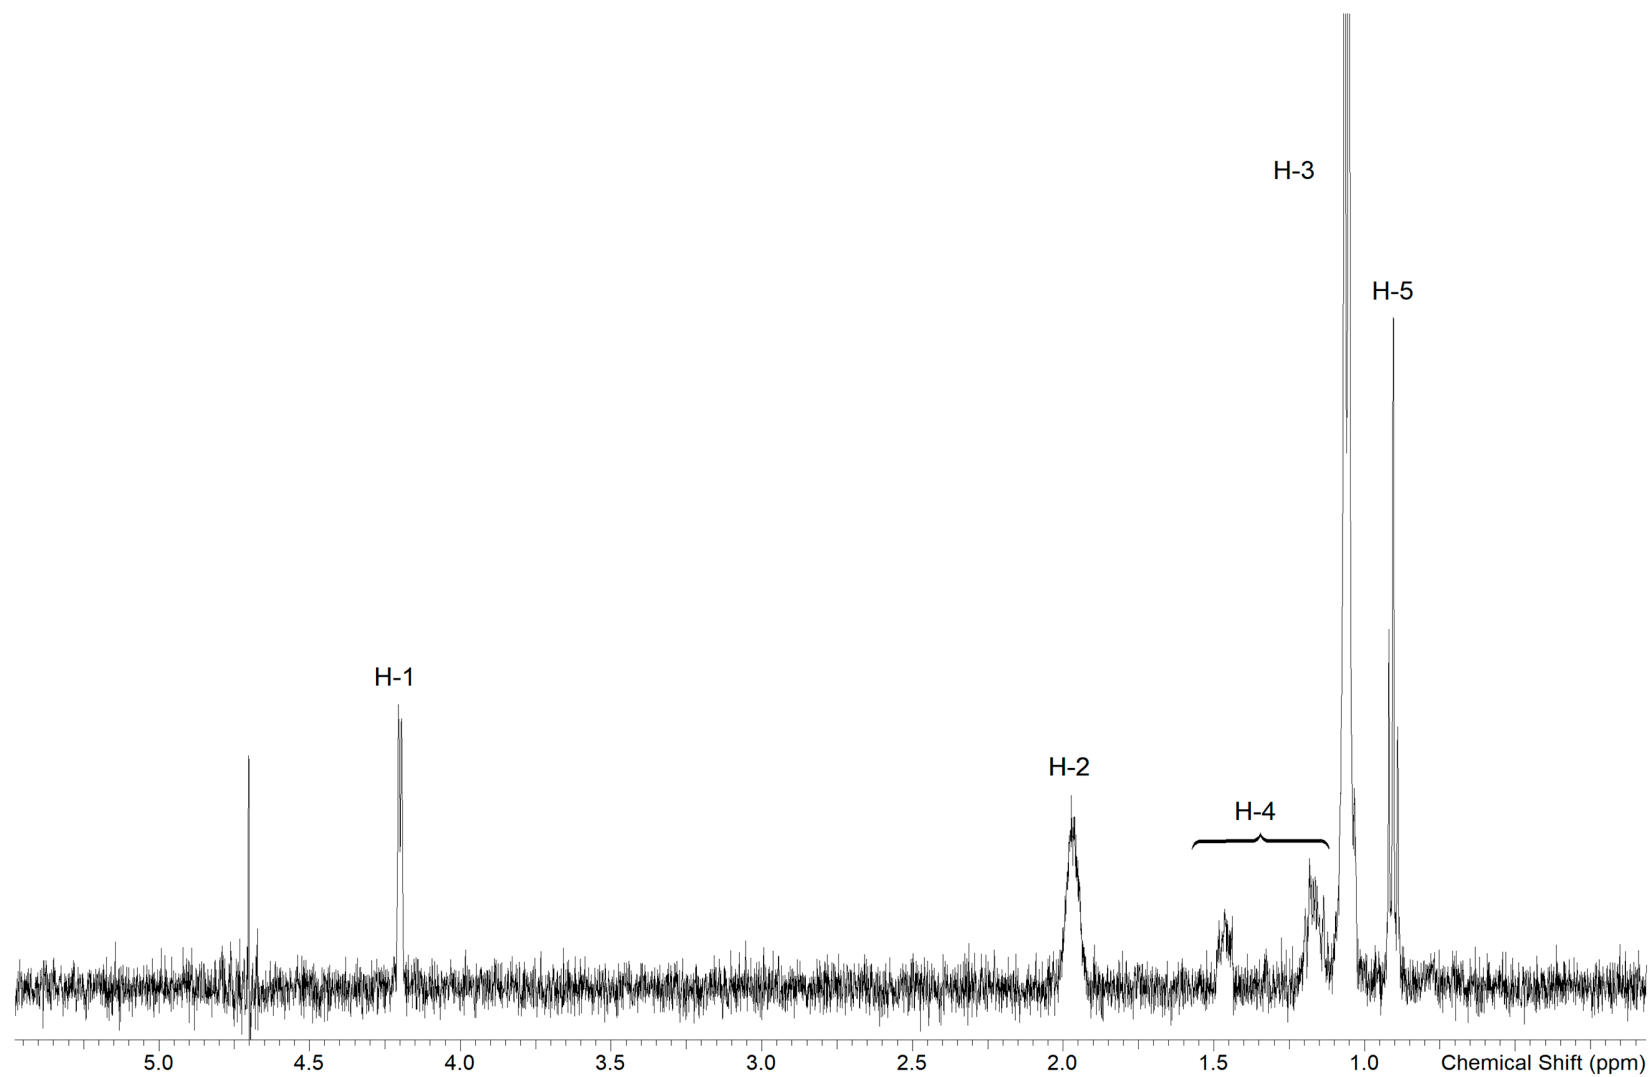

**Figure S9.** 1D selective TOCSY spectrum of miramide A (**1**) measured in D<sub>2</sub>O (500 MHz), irradiation at 1.06 ppm (H-3).

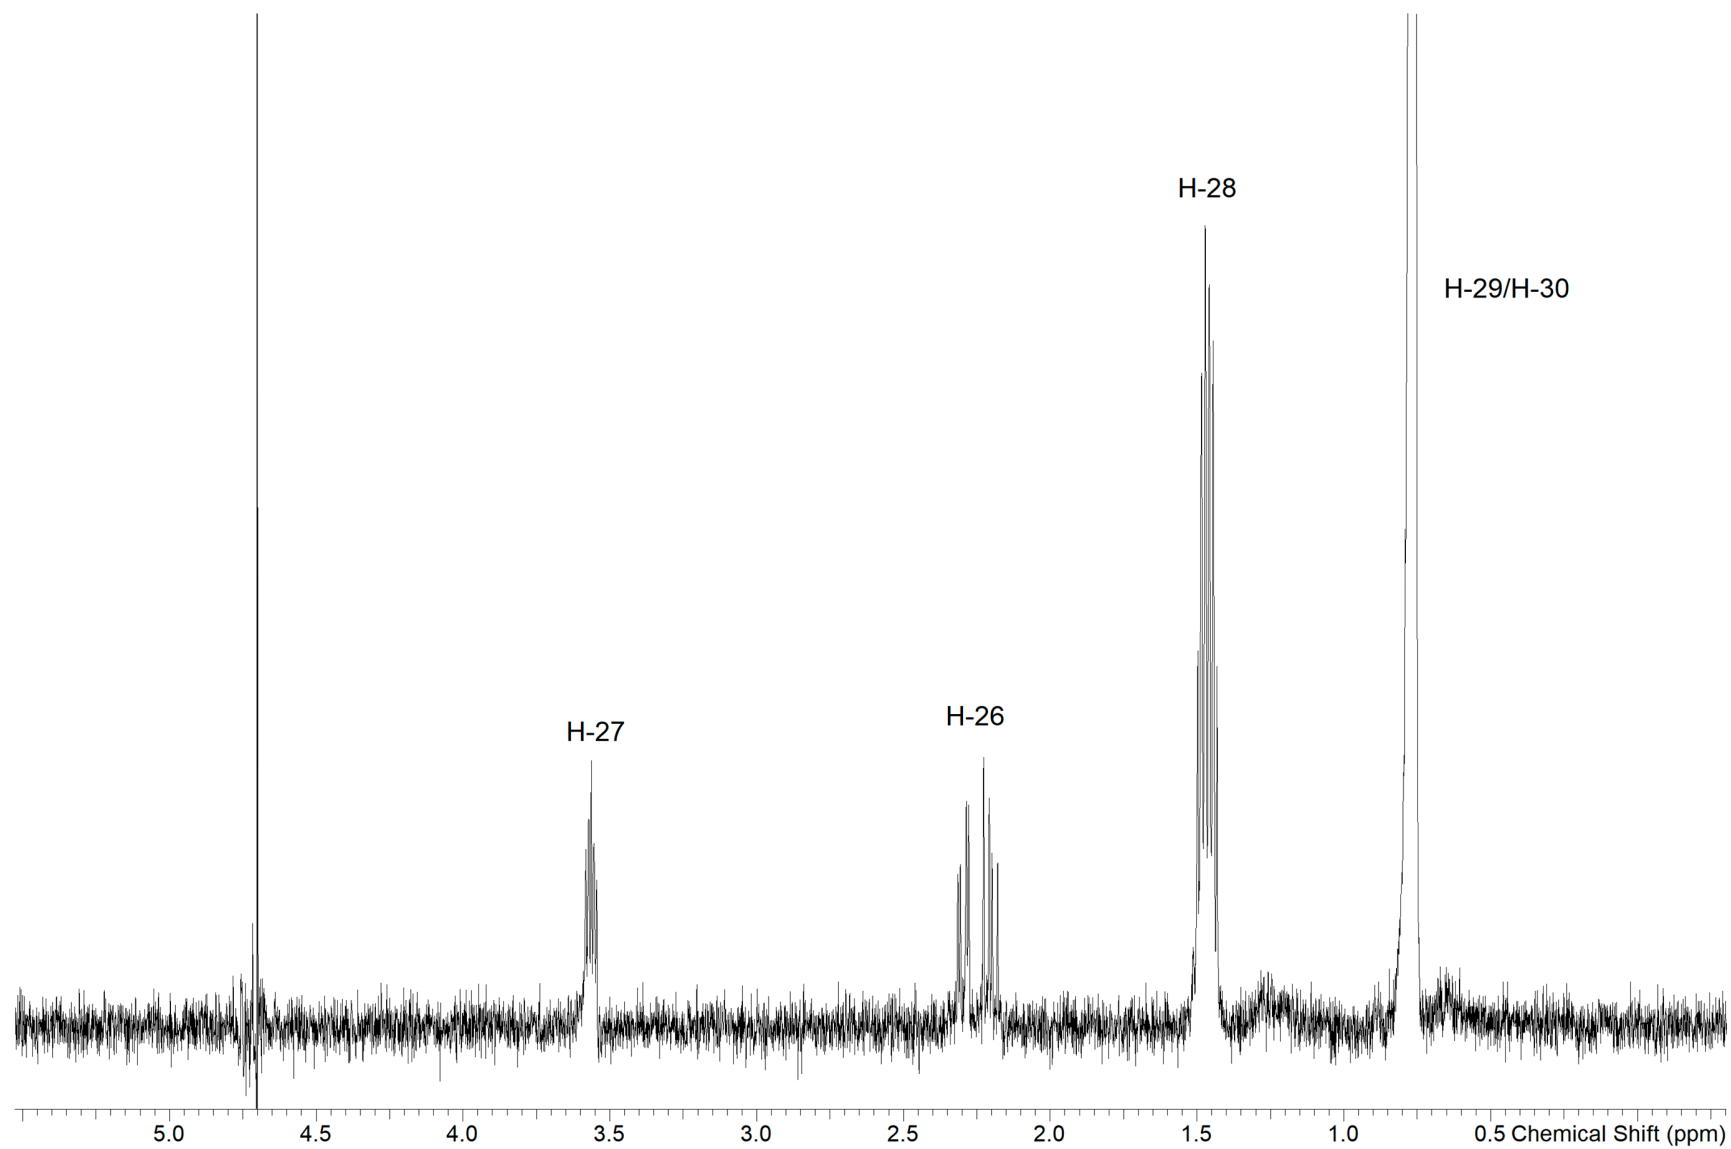

**Figure S10.** 1D selective TOCSY spectrum of miramide A (**1**) measured in D<sub>2</sub>O (500 MHz), irradiation at 0.76 ppm (H-29/H-30).

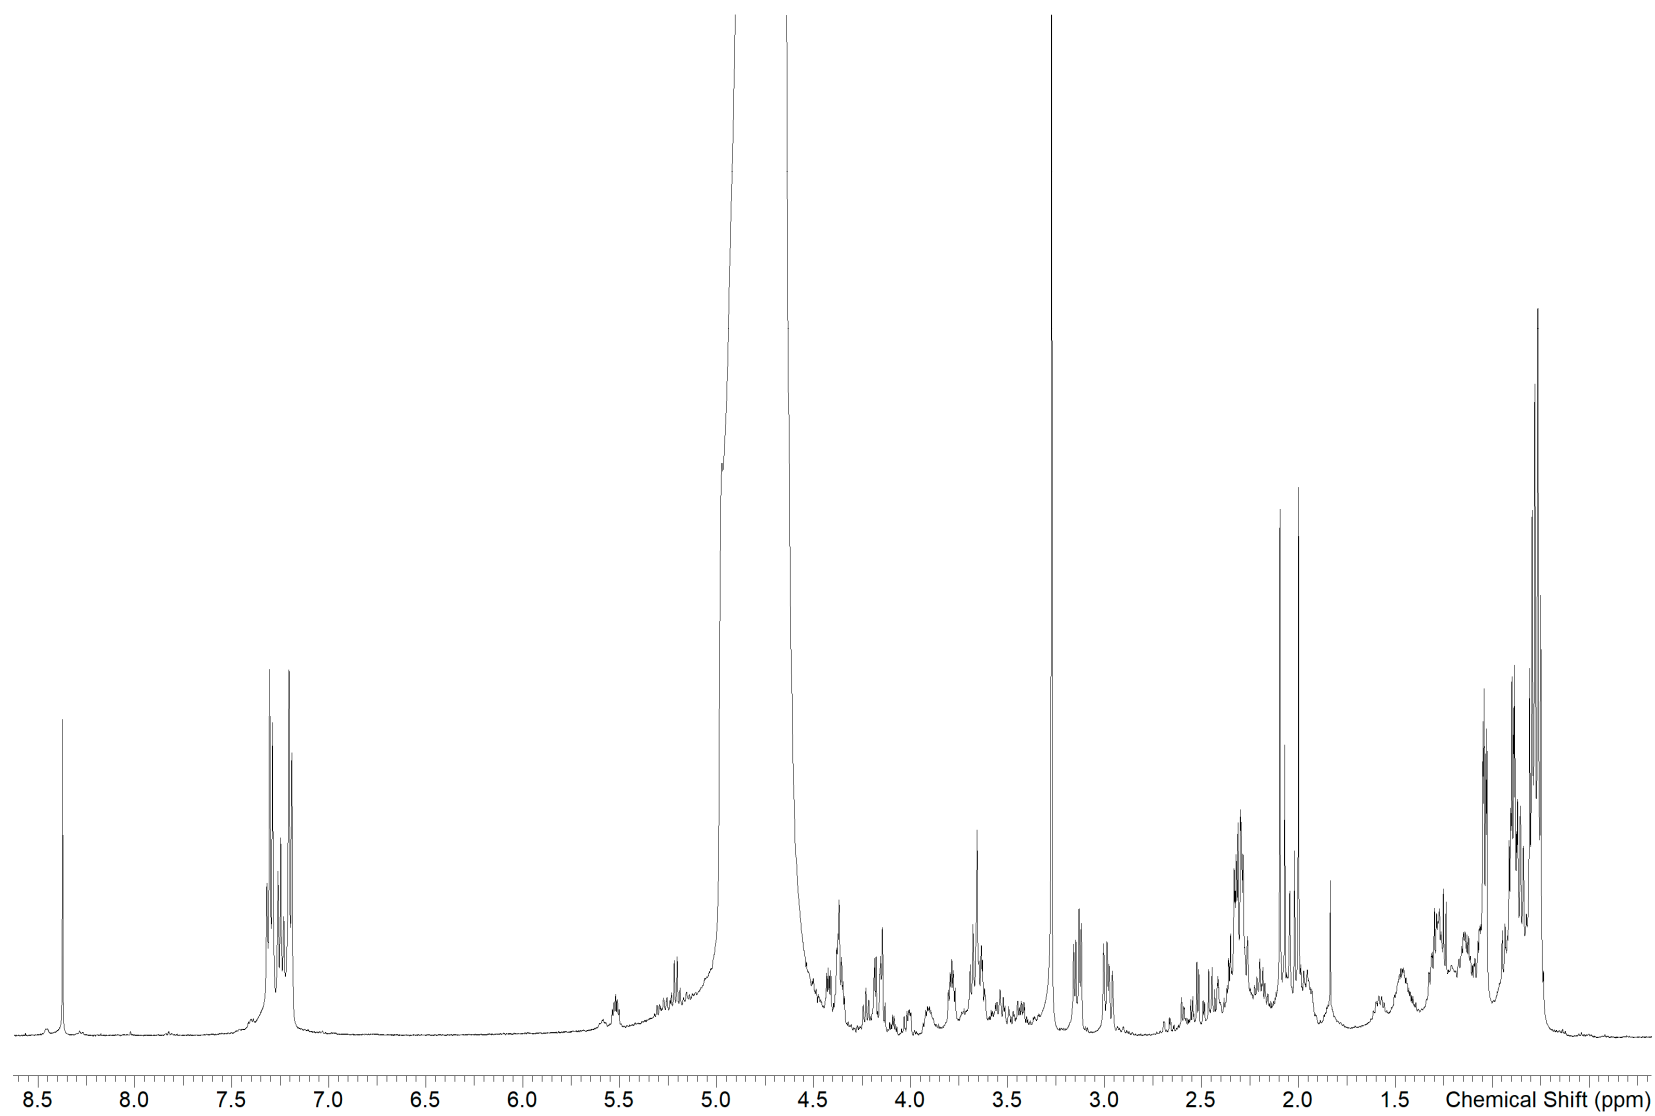

**Figure S11.**  $^1\text{H}$  NMR spectrum of miramide B (**2**)/ miramide C (**3**) measured in  $\text{D}_2\text{O}$  (500 MHz).

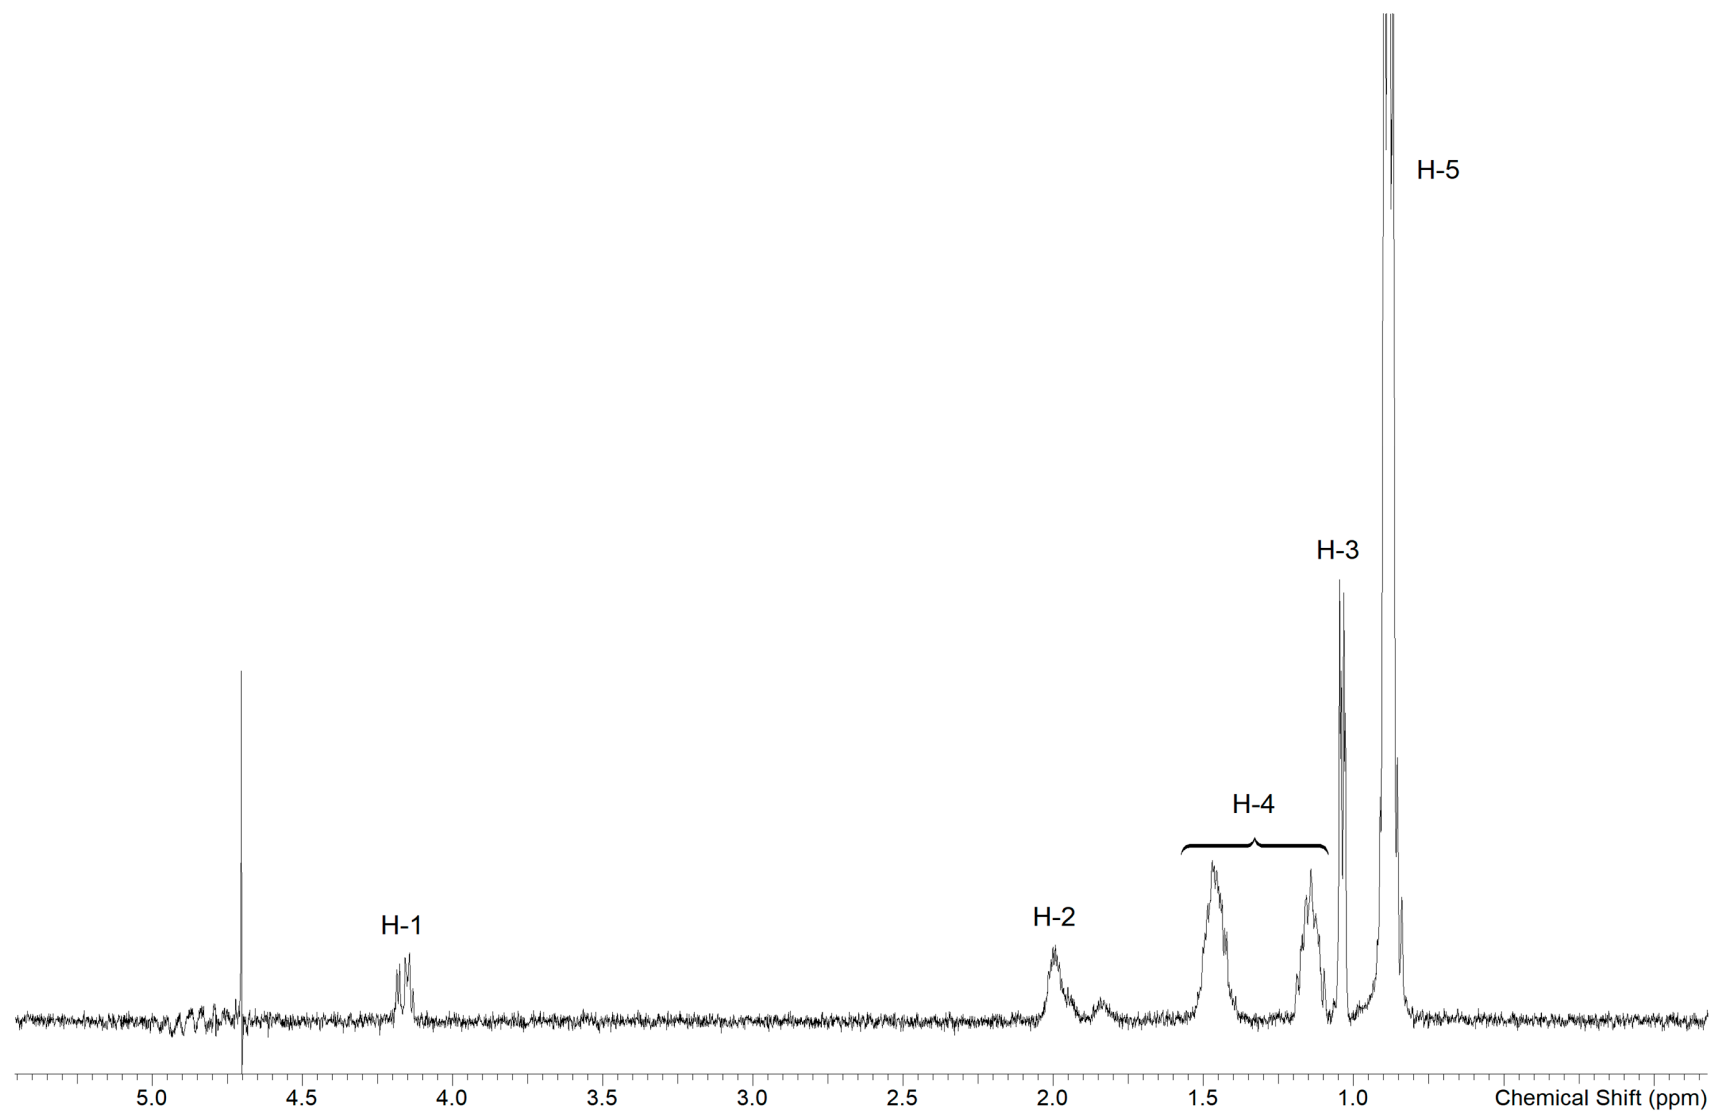

**Figure S12.** 1D selective TOCSY spectrum of miramide B (**2**)/ miramide C (**3**) measured in D<sub>2</sub>O (500 MHz), irradiation at 0.88 ppm (H-2).

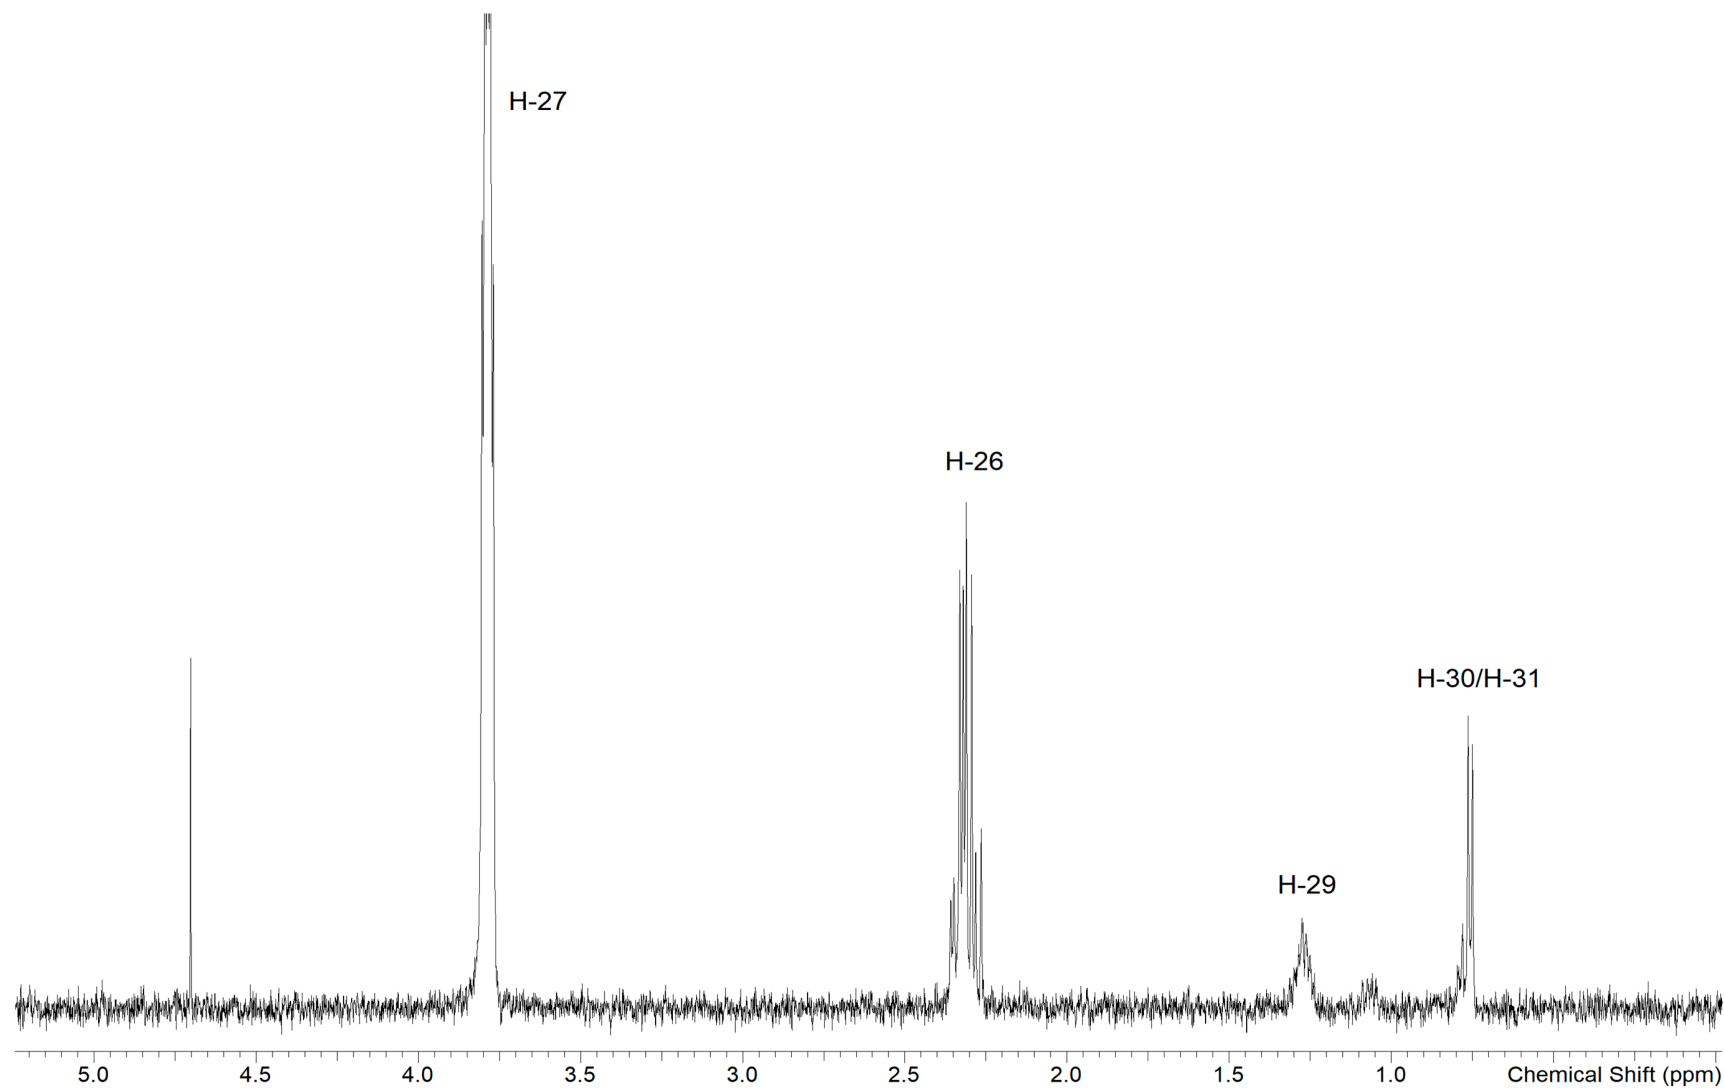

**Figure S13.** 1D selective TOCSY spectrum of miramide B (**2**)/ miramide C (**3**) measured in D<sub>2</sub>O (500 MHz), irradiation at 3.79 ppm (H-27, B).



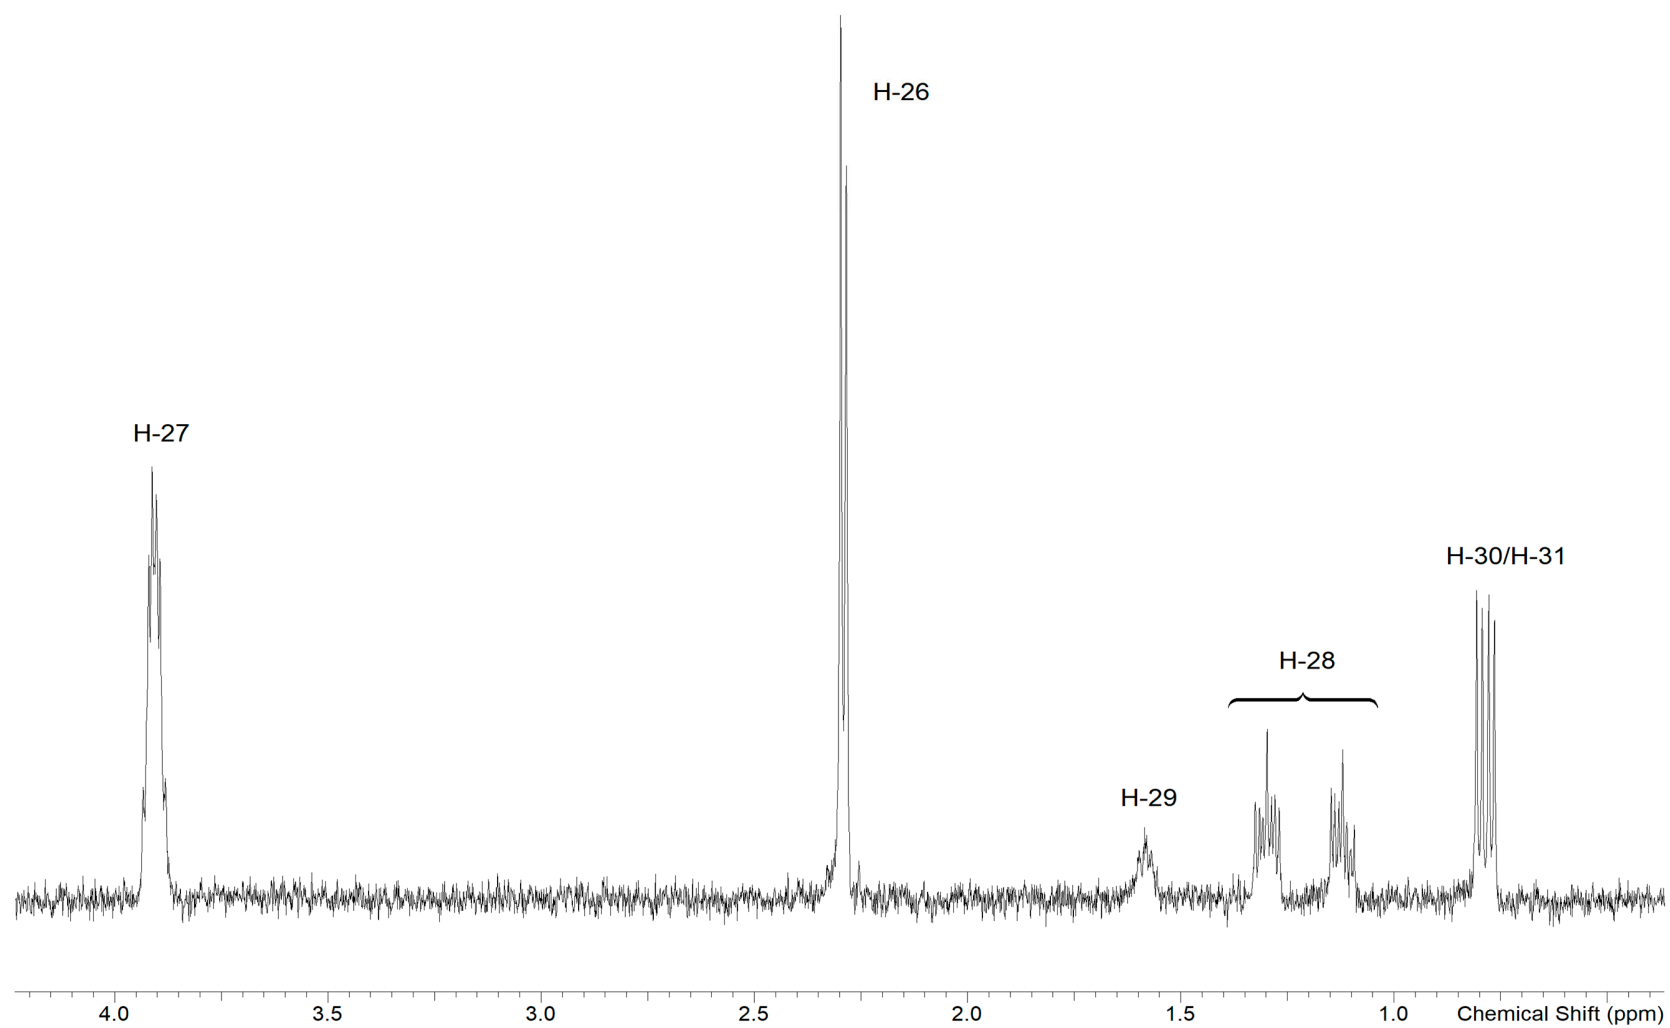

**Figure S14.** 1D selective TOCSY spectrum of miramide B (**2**)/ miramide C (**3**) measured in D<sub>2</sub>O (500 MHz), irradiation at 3.91 ppm (H-27, C).

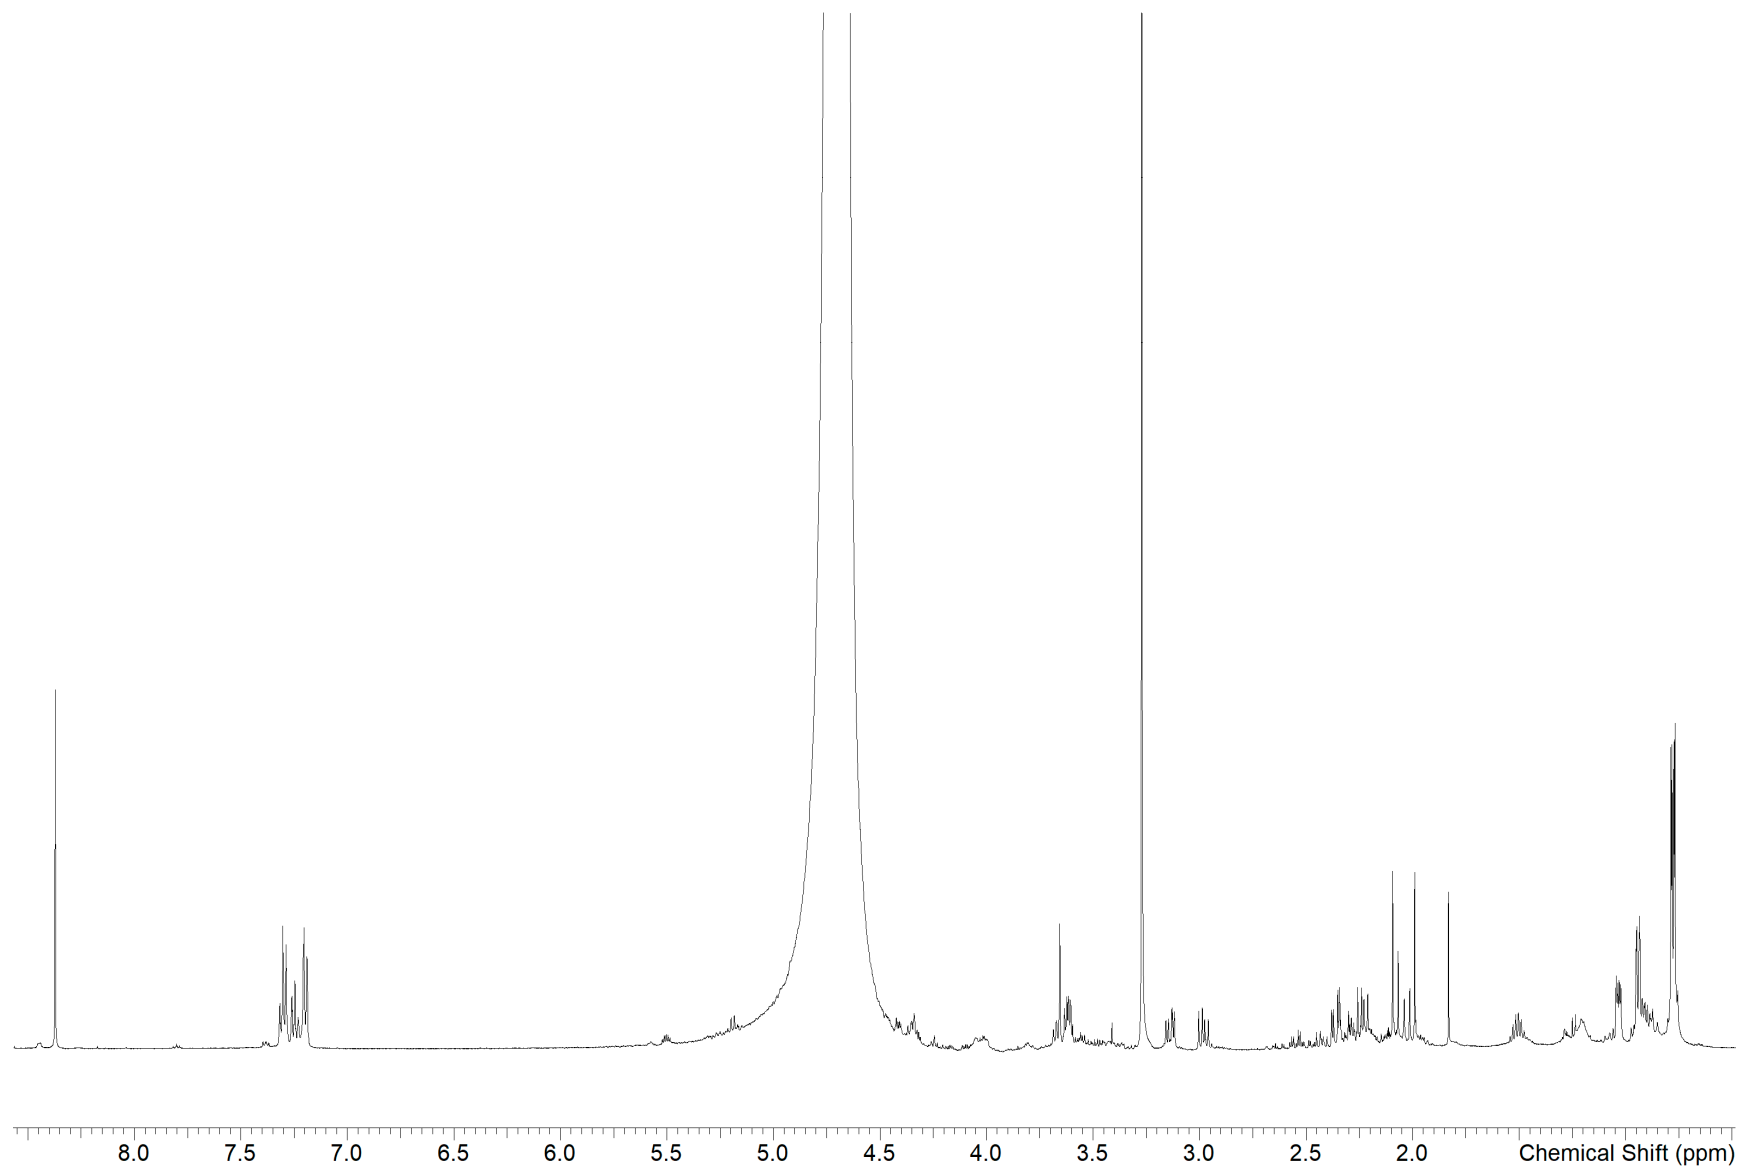

**Figure S15.**  $^1\text{H}$  NMR spectrum of miramide D (4) measured in  $\text{D}_2\text{O}$  (500 MHz).

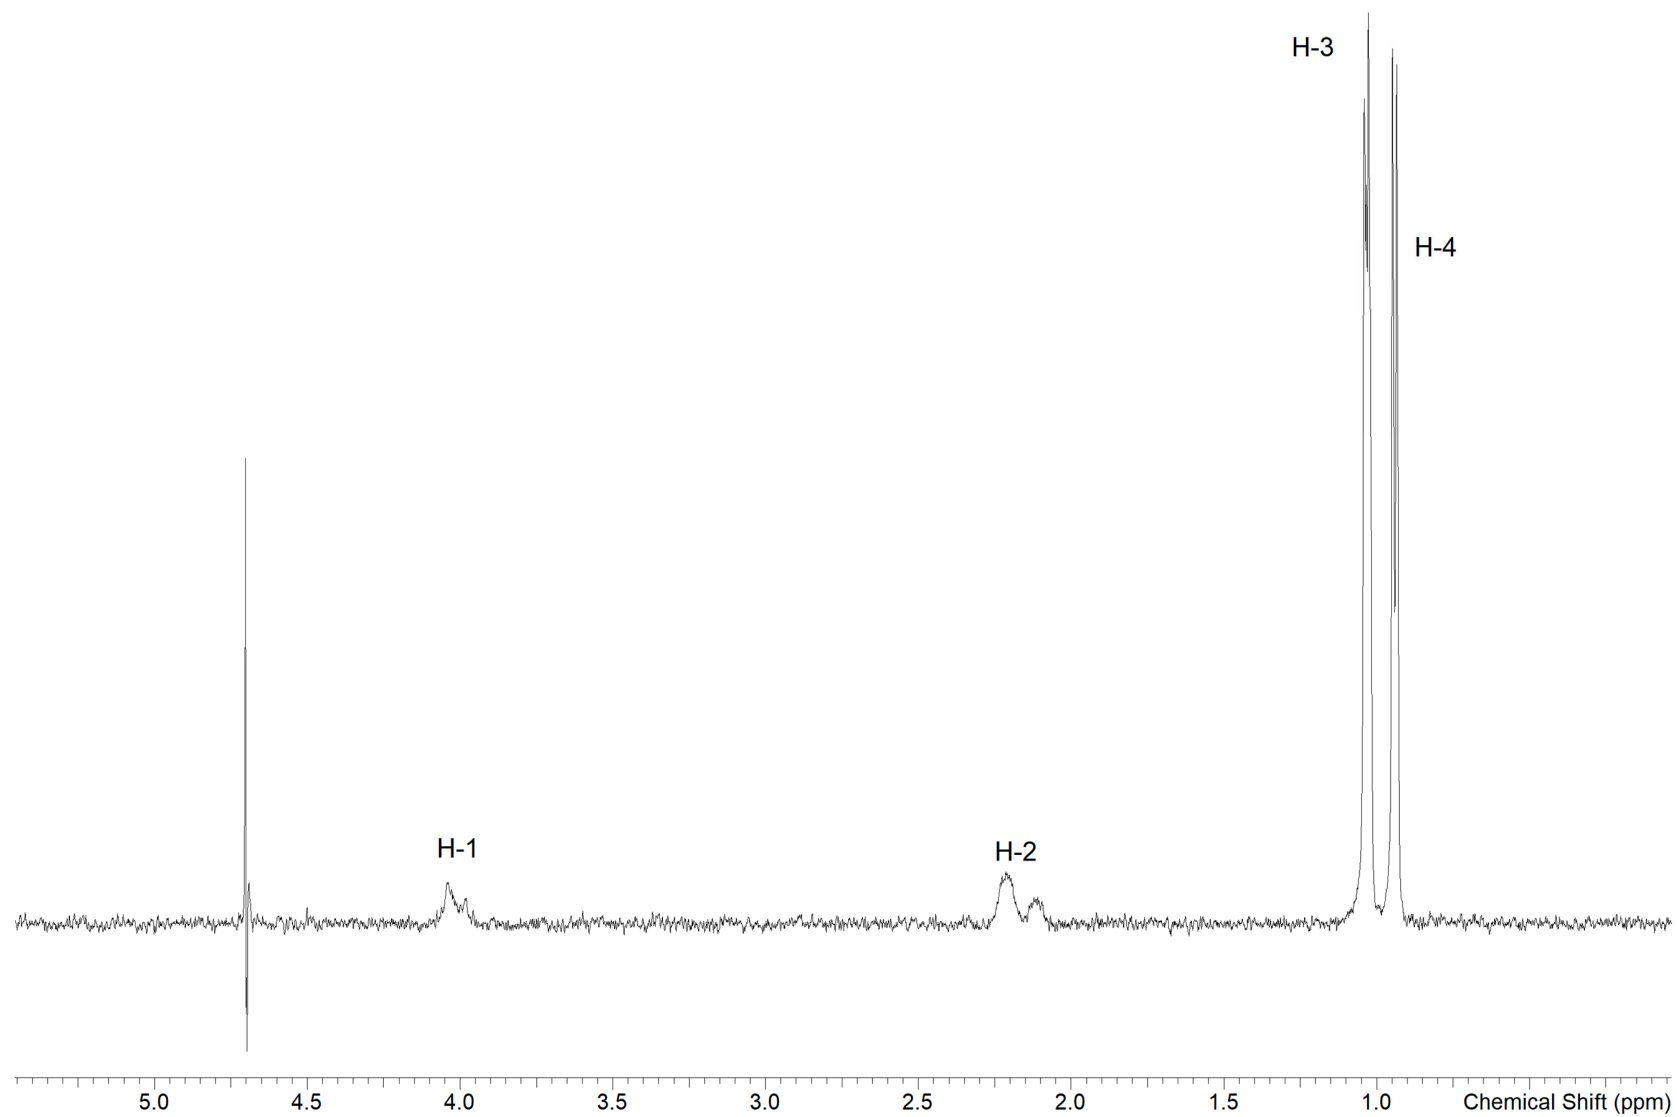

**Figure S16.** 1D selective TOCSY spectrum of miramide D (**4**) measured in D<sub>2</sub>O (500 MHz), irradiation at 1.03 ppm (H-3).

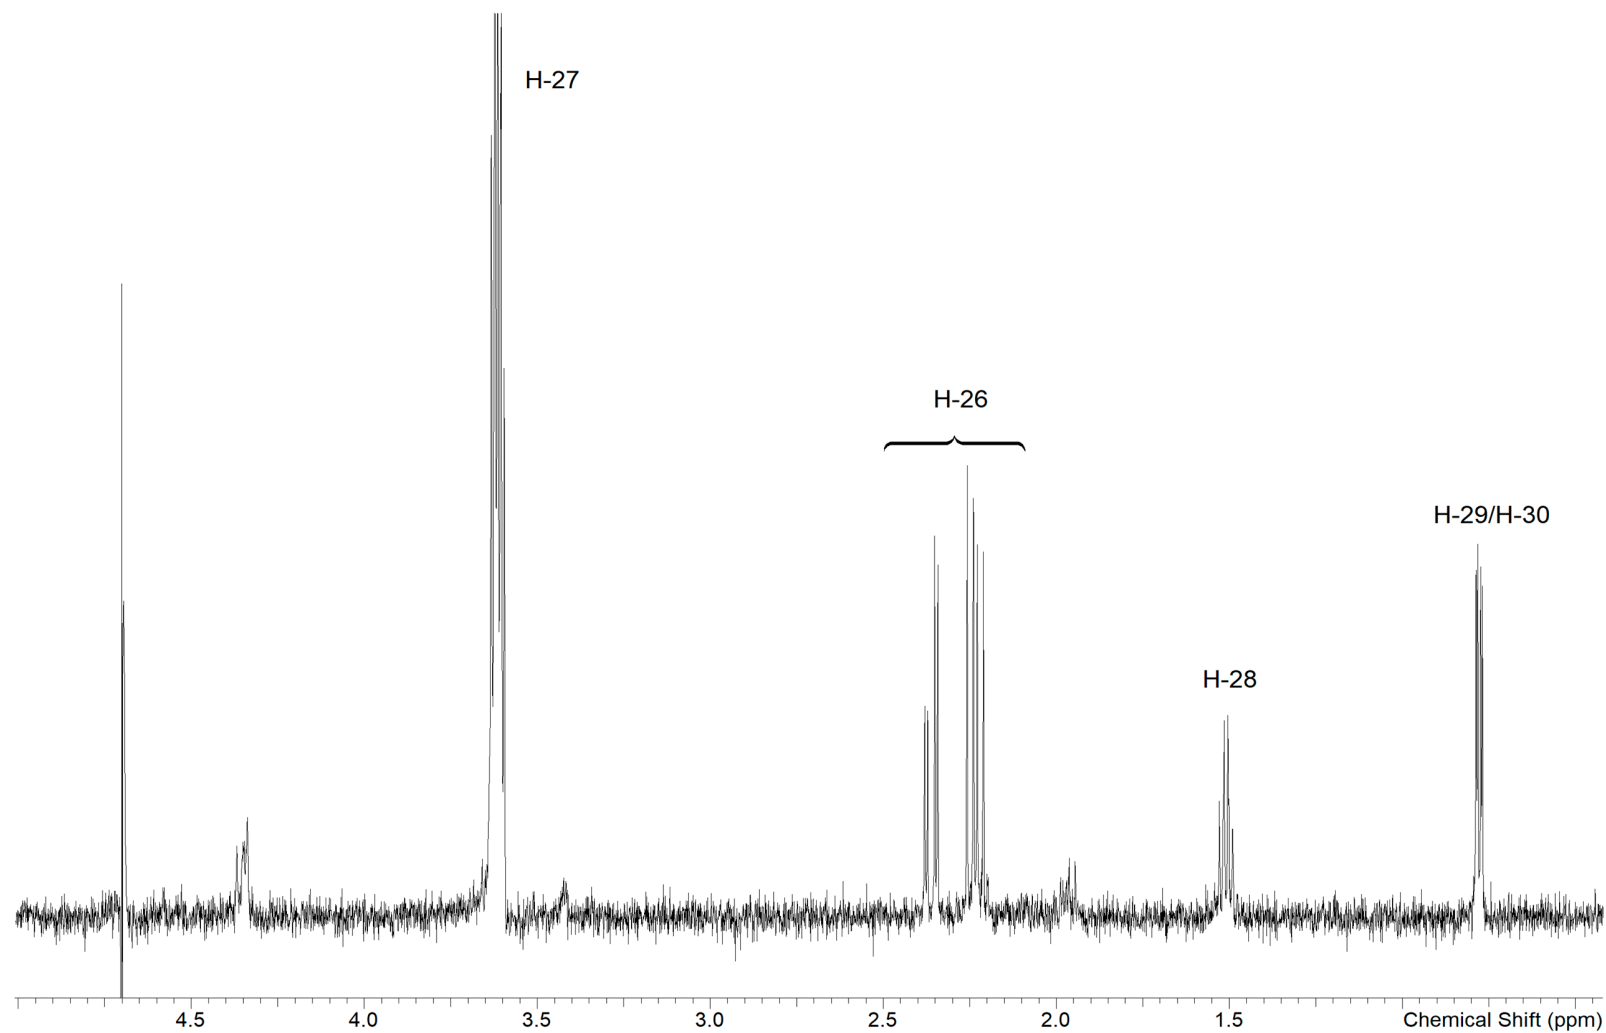

**Figure S17.** 1D selective TOCSY spectrum of miramide D (4) measured in D<sub>2</sub>O (500 MHz), irradiation at 3.61 ppm (H-27).

## References

1. Myronovskyi, M.; Rosenkränzer, B.; Nadmid, S.; Pujic, P.; Normand, P.; Luzhetskyy, A. Generation of a cluster-free *Streptomyces albus* chassis strains for improved heterologous expression of secondary metabolite clusters. *Metabolic engineering* **2018**, *49*, doi:10.1016/j.ymben.2018.09.004.
2. Flett, F.; Mersinias, V.; Smith, C.P. High efficiency intergeneric conjugal transfer of plasmid DNA from *Escherichia coli* to methyl DNA-restricting streptomycetes. *FEMS Microbiology Letters* **1997**, *155*, 223–229, doi:10.1016/S0378-1097(97)80014-6.
